# Supplementary material for: NOVA1 regulates hTERT splicing and cell growth in non-small cell lung cancer
Source: PubMed Central journal article supplement (PMC6079032; doi:10.1038/s41467-018-05582-x), 2018-08-06
Supplement: 41467_2018_5582_MOESM1_ESM.pdf [file 41467_2018_5582_MOESM1_ESM.pdf]

NOVA1 Regulates *hTERT* Splicing and Cell Growth in Non-Small Cell Lung  
Cancer

Ludlow et al. Supplementary information

**Supplementary Table 1: Description of major *hTERT* splice isoforms**

| <b>Isoform</b>     | <b>Exon structure</b>                                                                           | <b>Intron retention?</b>                                   | <b>Biochemical function</b>                                                                                                                                                | <b>References</b> |
|--------------------|-------------------------------------------------------------------------------------------------|------------------------------------------------------------|----------------------------------------------------------------------------------------------------------------------------------------------------------------------------|-------------------|
| <b>Full-length</b> | 1-16.                                                                                           | no                                                         | Functional <i>hTERT</i> protein, maintains telomeres when in active telomerase holoenzyme (RNP)                                                                            | <sup>1, 2</sup>   |
| <b>Minus beta</b>  | 1-6, 9, and 10; PTC in 10.                                                                      | no                                                         | Mostly degraded by non-sense mediated decay, some translated into protein and may play a role in DNA damage repair/ protection from apoptosis, may bind <i>hTERC (hTR)</i> | <sup>3</sup>      |
| <b>Minus alpha</b> | 1-16, alternative 3' splice acceptor site in exon 6 generates in frame shift of 36 nucleotides. | no                                                         | Dominant-negative, binds <i>hTERC (hTR)</i>                                                                                                                                | <sup>1, 4</sup>   |
| <b>INS3</b>        | 1-16 plus, PTC in intron 14.                                                                    | Retention of intron 14 nucleotide 623 to end on intron 14. | Dominant-negative, binds <i>hTERC (hTR)</i>                                                                                                                                | <sup>5</sup>      |
| <b>INS4</b>        | 1-14, and alternative exon 16 3' splice site NT492, PTC in exon 14.                             | Retention of intron 14 nucleotides 1-600.                  | Dominant-negative, binds <i>hTERC (hTR)</i>                                                                                                                                | <sup>5</sup>      |
| <b>DEL2</b>        | 1,3-16, PTC in exon 3.                                                                          | No                                                         | Proposed mitochondrial <i>hTERT</i> variant, retains <i>hTERT</i> MLS in exon 1.                                                                                           | <sup>6</sup>      |

**PTC – premature termination codon. RNP – ribonucleoprotein. NT- nucleotide.**

| Supplementary Table 2. Primers and probes |                            |                                               |                                |                       |
|-------------------------------------------|----------------------------|-----------------------------------------------|--------------------------------|-----------------------|
| Primer pairs                              | Primer name                | Exon location                                 | Primer sequence (5'-3')        | Probe – UPL or custom |
| 1                                         | hTERT 3' F                 | 15/16 boundary                                | GGGTCACTCAGGACAGCCCAG          | 37                    |
| 1                                         | hTERT 3' R                 | 16                                            | GGGCGGGTGGCCATCAGT             |                       |
| 2                                         | hTERT RT F                 | 7/8 boundary                                  | ACAGTTCGTGGCTCACCTG            | 52                    |
| 2                                         | hTERT RT R                 | 8                                             | GCGTAGGAAGACGTCTGAAGA          |                       |
| 3                                         | hTERT 5' F                 | 2                                             | AAGCATGCCAAGCTCTCG             | 17                    |
| 3                                         | hTERT 5' R                 | 3                                             | CAGGATCTCCTCACGCAGAC           |                       |
| 4                                         | Minus Beta F               | 6/9 boundary                                  | CAAGAGCCACGTCCTACGTC           | 58                    |
| 4                                         | Minus Beta R               | 9                                             | CAAGAAATCATCCACCAAACG          |                       |
| 5                                         | Minus Alpha F              | 5                                             | G TTCAGCGTGCTCAACTACG          | custom                |
| 5                                         | Minus Alpha R              | 6                                             | GTTCTGGGGTTTGATGATGC           |                       |
| 6                                         | INS3 F                     | Retained intron 14                            | AGAGATGGAGCCACCCCGCA           | custom                |
| 6                                         | INS3 R                     | Retained intron 14 3' end /exon 15 boundaries | AGCGACATCCCTGGGGGAAAAC         |                       |
| 7                                         | INS4 F                     | Exon 14                                       | TGAAAGCCAAGAACGCAGGTAT         | custom                |
| 7                                         | INS4 R                     | Intron 14 5' end                              | TAAGCCCAGATTCACCTCAGTCTCC      |                       |
| 8                                         | MS2T1 F (assembly protein) | linear RNA (nt - 632)                         | GTCGCGGTAATTGGCGC              | custom                |
| 8                                         | MS2T1 R (assembly protein) | linear RNA (nt - 708)                         | GGCCACGTGTTTTGATCGA            |                       |
| 9                                         | MS2T2 F (lysis protein)    | linear RNA (nt - 1693)                        | CCTCAGCAATCGCAGCAA             | custom                |
| 9                                         | MS2T2 R (lysis protein)    | linear RNA (nt - 1807)                        | GGAAGATCAATACATAAAGAGTTGAACTTC |                       |
| 10                                        | TERT CLIP intron 5 F       |                                               | GTCAGAGAAGGAACCGCAAC           | Evagreen              |
| 10                                        | TERT CLIP intron 5 R       |                                               | TGAGCCTCAGGACAGGAGAC           | Evagreen              |
| 11                                        | TERT CLIP exon 6 F         |                                               | GCATCATCAAACCCAGAAC            | Evagreen              |
| 11                                        | TERT CLIP exon 6 R         |                                               | CTTCTGGACCACGGCATAAC           | Evagreen              |
| 12                                        | TERT CLIP intron 6 F       |                                               | CATGTTTCATGCTGTGTGCTG          | Evagreen              |
| 12                                        | TERT CLIP intron 6 R       |                                               | AGGAAGGAGTAAGGCCAAGG           | Evagreen              |
| 13                                        | TERT CLIP intron 6.2 F     |                                               | CAGTCTTTACTGTGTGCTGAGCTTGC     | Evagreen              |
| 13                                        | TERT CLIP intron 6.2 R     |                                               | AACCAATCCCACCTACCC             | Evagreen              |
| 14                                        | TERT CLIP intron 6.3 F     |                                               | CCTGTAGTGGGTCTGCAGGT           | Evagreen              |
| 14                                        | TERT CLIP intron 6.3 R     |                                               | CCCGACCATAGTTCAAAGGA           | Evagreen              |
| 15                                        | TERT CLIP intron 6.4 F     |                                               | CTGCAATCCCTCCAGCAC             | Evagreen              |
| 15                                        | TERT CLIP intron 6.4 R     |                                               | CACAGTCACGTGGCACAAG            | Evagreen              |

|    |                         |                   |                                |           |
|----|-------------------------|-------------------|--------------------------------|-----------|
| 16 | TERT CLIP intron 7 F    |                   | GCCTAAGCCCATGTGTGTCT           | Evagreen  |
| 16 | TERT CLIP intron 7 R    |                   | TTTGGGGTCAGTGTTTGTGA           | Evagreen  |
| 17 | TERT CLIP exon 8 F      |                   | CTGAATGAGGCCAGCAGTG            | Evagreen  |
| 17 | TERT CLIP exon 8 R      |                   | GGCACATGAAGCGTAGGAAG           | Evagreen  |
| 18 | TERT CLIP intron 8 F1   |                   | TGGCAGCAGAGTGAATTTTG           | Evagreen  |
| 18 | TERT CLIP intron 8 R1   |                   | TCTGGGGAGGTGACTTTGTC           | Evagreen  |
| 19 | TERT CLIP intron 8 F2   |                   | GCGCCTGGCTAATTTTTGTGA          | Evagreen  |
| 19 | TERT CLIP intron 8 R2   |                   | CCTGAGGTCAGGAGTTCGAG           | Evagreen  |
| 20 | TERT CLIP exon 9 F      |                   | ATCCTCTCCACGCTGCTCT            | Evagreen  |
| 20 | TERT CLIP exon 9 R      |                   | ACAGCTTGTTCTCCATGTCG           | Evagreen  |
| 21 | TERT CLIP intron 9 F    |                   | CAGCCCCTTCTTGGTATGAA           | Evagreen  |
| 21 | TERT CLIP intron 9 R    |                   | GTGCTTCCTCGGTGTTGAAT           | Evagreen  |
| 22 | GLRA CLIP region 1 F    |                   | CAAATGGCTCCTGGGTA AAA          | Evagreen  |
| 22 | GLRA CLIP region 1 R    |                   | CCTTCAGCCAAACTACAGTGC          | Evagreen  |
| 23 | GLRA CLIP region 2 F    |                   | GGCCTTCTCATCATTTTTGG           | Evagreen  |
| 23 | GLRA CLIP region 2 R    |                   | ACAGGGTCTGCTTCTTGGAA           | Evagreen  |
| 24 | GLRA CLIP region 3 F    |                   | CCTGCCTTTCCAACAGCTTA           | Evagreen  |
| 24 | GLRA CLIP region 3 R    |                   | CACGTAGGAAAGGTTGGGATT          | Evagreen  |
| 25 | GAPDH CLIP F            |                   | AGCCACATCGCTCAGACAC            | Evagreen  |
| 25 | GAPDH CLIP R            |                   | GCCCAATACGACCAAATCC            | Evagreen  |
| 26 | TS                      | ddTRAP            | AATCCGTGAGCAGAGTT              | Evagreen  |
| 26 | ACX                     | ddTRAP            | GCGCGGCTTACCCTTACCCTTACCCTAACC | Evagreen  |
| 27 | hTERT DR8 YAAY mutant F | CRIPSR genotyping | GGCTTGAGTGCAGTGGCGCG           | Gel based |
| 27 | hTERT DR8 YAAY mutant R | CRIPSR genotyping | TTTCGGAAGCGCTATAG              | Gel based |
| 28 | hTERT DR8 F deletion    | CRIPSR genotyping | ACCTCCCCAGAGAAGCCACCAC         | Gel based |
| 28 | hTERT DR8 R deletion    | CRIPSR genotyping | TGCACACAGAAGGCATGGC            | Gel based |
| 29 | hTERT DR8 F deletion 2  | CRIPSR genotyping | TGGCAGCAGAGTGAATTTTG           | Gel based |
| 29 | hTERT DR8 R deletion 2  | CRIPSR genotyping | TCAGCATGACCAACGAGAAG           | Gel based |
| 30 | hTERT 5-9 F 2109        | hTERT RT-PCR      | GCCTGAGCTGTACTTTGTCAA          | Gel based |
| 30 | hTERT 5-9 R 2531R       | hTERT RT-PCR      | AGGCTGCAGAGCAGCGTGGAGAGG       | Gel based |

Notes: UPL – Universal Probe Library (Roche).

Notes: Custom probe sequence available on request.



## Supplementary Figure 1

(A) *hTERT* minigene luciferase assay of controls used in the screen. 'Cell only' contains cells and media. 'siCTRL' is the siRNA scrambled control. 'UBB' is a pool of four siRNAs targeting ubiquitin. hnRNPH1 is a pool of four siRNAs targeting the splicing factor hnRNPH1. Data are expressed as means  $\pm$  standard deviation.

(B) Secreted embryonic alkaline phosphatase (SEAP) viability assay. Viability for the siRNA scrambled control (siRNA control), 'cell only' control, *NOVA1*, and UBB siRNA pools are pointed out. All data are expressed relative to cell only control, set at a value of '1'. 'Cell only' contains cells and media. 'siCTRL' is the siRNA scrambled control. 'UBB' is a pool of four siRNAs targeting ubiquitin.

(C) Pearson's *r* correlation between minigene siRNA screen repeats.

(D) Steady state expression of *hTERT* mRNAs across the *hTERT* locus showing general expression patterns in cell lines with and without telomerase activity. Expression is expressed in molecules per cell. Each data point represents three individual reverse transcription reactions repeated twice in droplet digital PCR. Data are expressed at means  $\pm$  standard errors of the mean.

(E) Telomerase enzyme activity as determined by droplet digital TRAP (ddTRAP) and telomere length (terminal restriction fragment (TRF) lengths from Frink et al. 2016, Oncotarget). Telomerase was determined using 50 cell equivalents input.

(F) *NOVA1* mRNA levels in normal and transformed cells. Data are expressed per 25 ng of cDNA input. Data are expressed as means  $\pm$  standard errors of the mean.

(G) Pearson's *r* correlation between telomere length (TRF) and ddTRAP determined telomerase enzyme activity analysis. Telomerase determined by ddTRAP (above in E) using 50 cell equivalents (eq.).

(H) Pearson's *r* correlation between telomere length (TRF) and mRNA expression of *hTERT* RT domain (exons 7 and 8) and 3' end (exons 15 and 16) on a per cell basis.

(I) Pearson's *r* correlation between telomerase enzyme activity (ddTRAP, 50 cell equivalents) and log<sub>2</sub> mRNA expression of *hTERT* RT domain (exons 7 and 8) on a per cell basis.

(J) Cluster dendrogram for "network discovery analysis". Cluster analysis shows the 'closeness' of the cell lines for *hTERT* mRNA expression, telomerase activity and *NOVA1* mRNA expression.

(K) Minigene targets (2-fold or greater) that overlapped with data generated from the microarray analyses (both "gene discovery" and "network" overlapping genes are included). Data are expressed as means  $\pm$  standard errors of the mean.

(L) Pearson's *r* correlation analysis of log<sub>2</sub> *NOVA1* mRNA expression with percent *hTERT* potential full-length (FL) splicing (mRNA).

(M) Pearson's *r* correlation analysis of percent full-length (FL) *hTERT* with log<sub>2</sub> *NOVA1* protein expression.

(N) Pearson's *r* correlation between *NOVA1* protein levels and mRNA levels.

(O) Validation of *NOVA1* siRNA mediated knockdown at the mRNA level in H1299 and H920 cells. Cells were collected and analyzed 72 hours after siRNA transfection.

(P) mRNA expression of *hTERT* following siRNA mediated knockdown of *NOVA1* in H1299 and H920 cells (as in O). Shows reduction of RT domain containing transcripts (exons 7 and 8) and maintenance of total levels of *hTERT* expression (3' exons 15 and 16). Data are expressed as means  $\pm$  standard errors of the mean.

TRF – terminal restriction fragment length for determination of telomere length.

Supplementary Figure 2

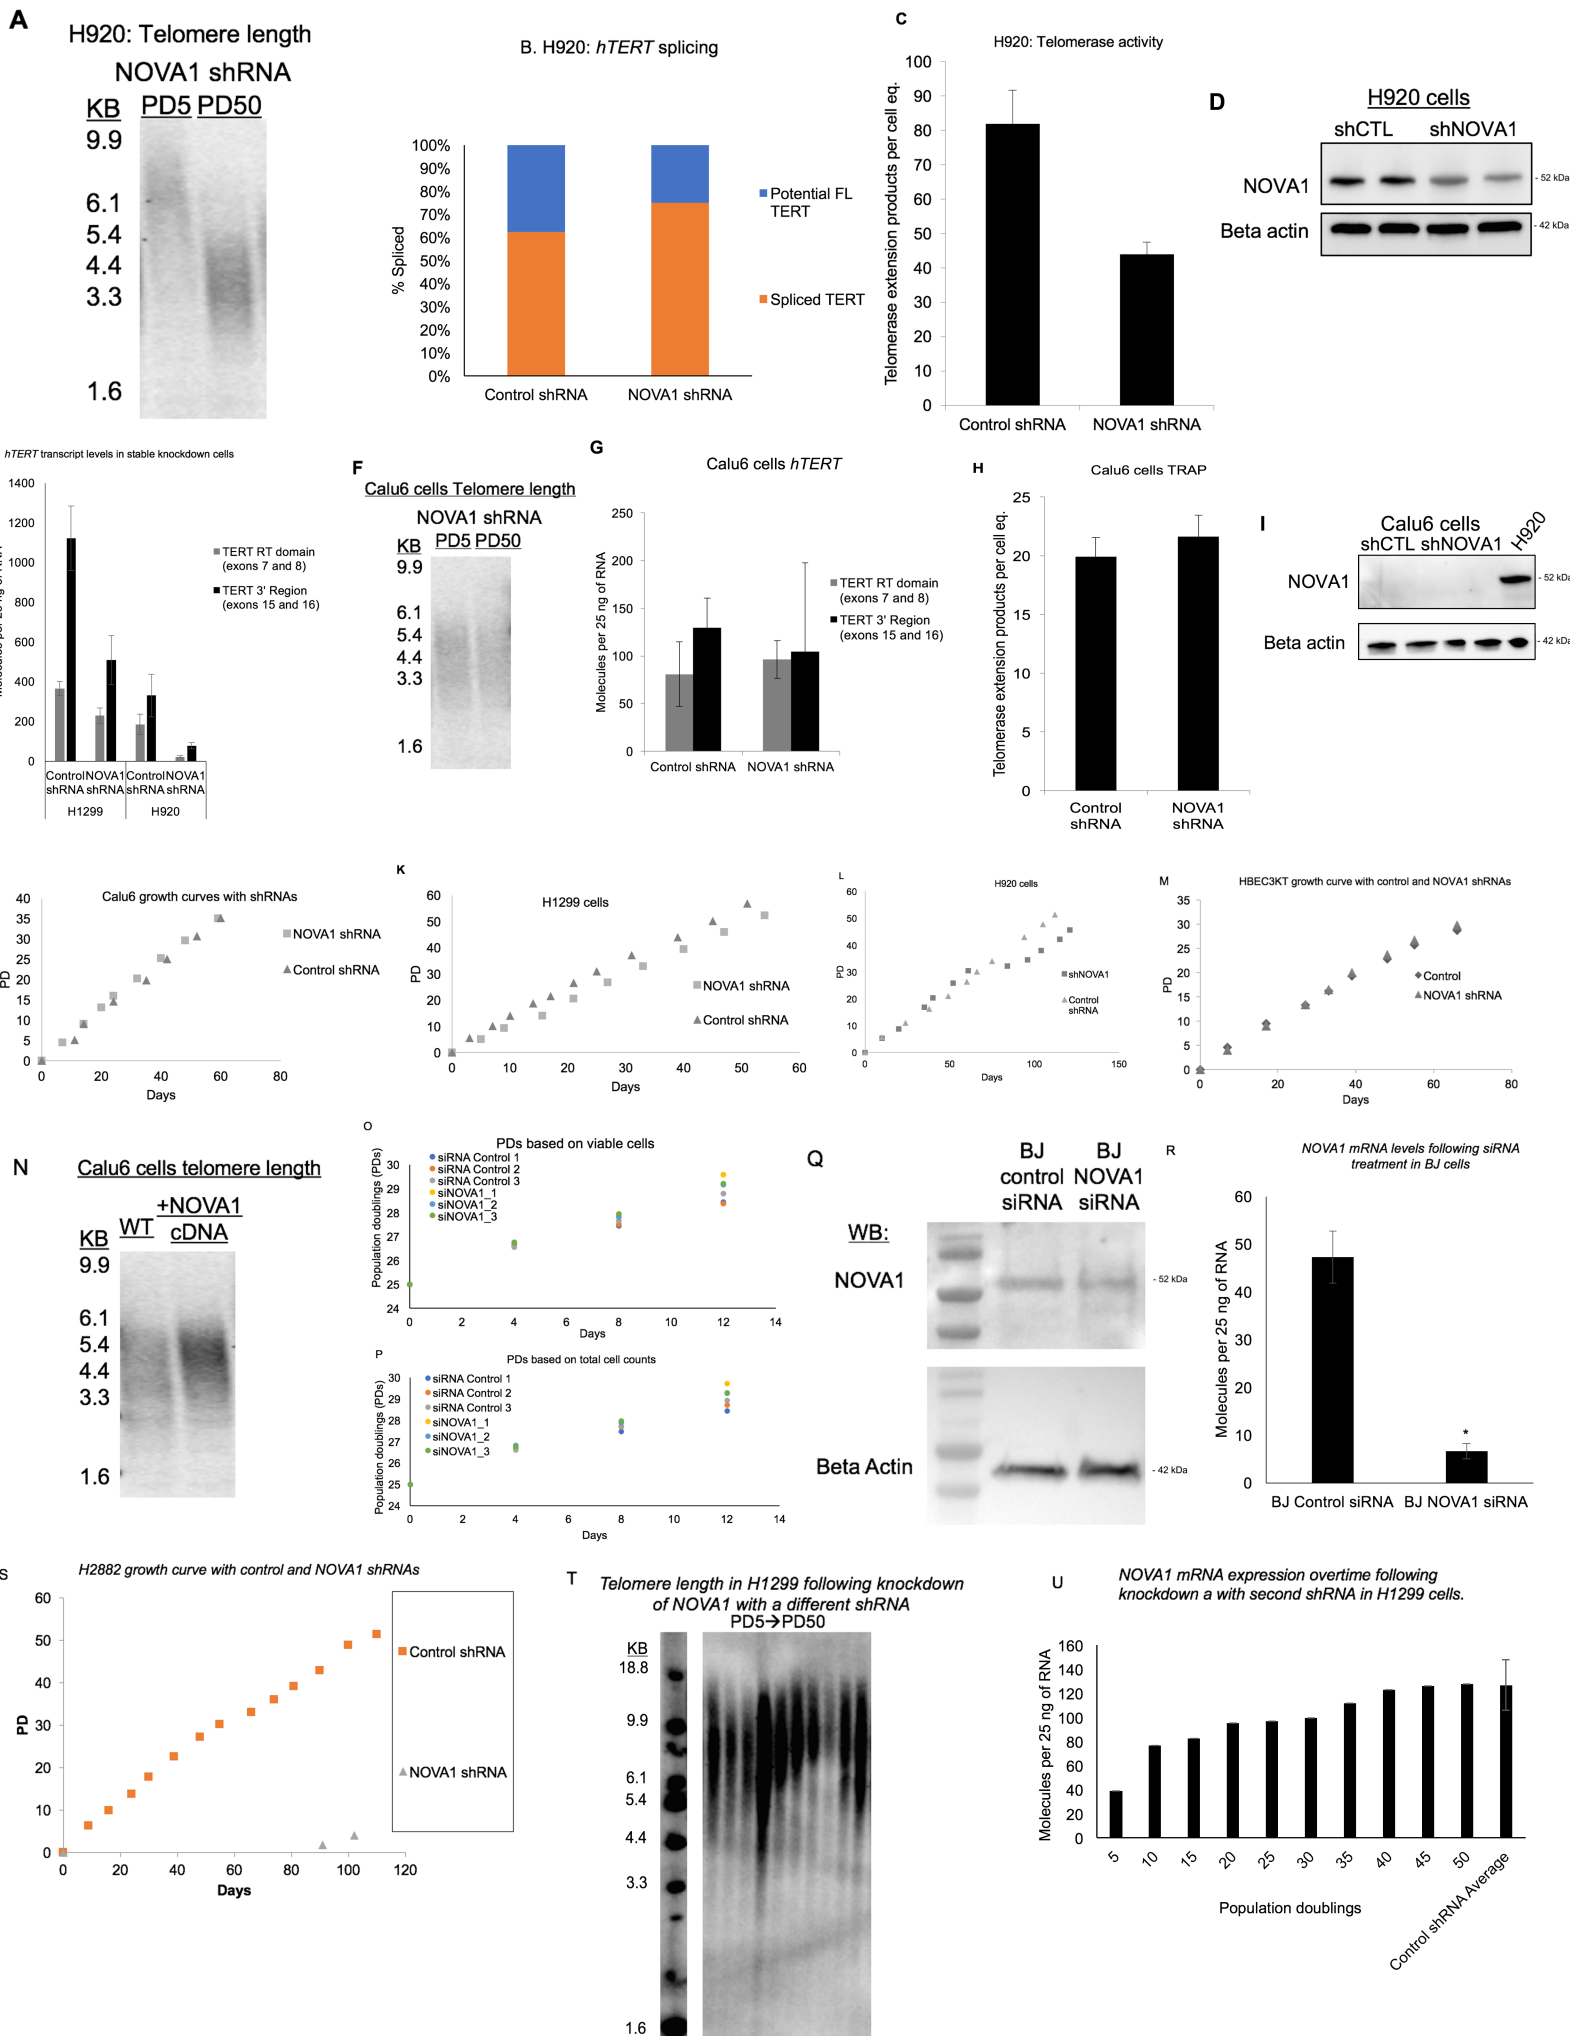

## Supplementary Figure 2

- (A) Terminal Restriction Fragment (TRF) analysis of H920 cells with control non-silencing shRNA or *NOVA1* shRNA mediated knockdown at population doubling (PD) 5 and 50.
- (B) *hTERT* RT-ddPCR splicing isoform analysis of H920 cells with control non-silencing shRNA or *NOVA1* shRNA mediated knockdown over the course of the experiment.
- (C) Telomerase activity determined by ddTRAP in H920 cells with control non-silencing shRNA or *NOVA1* shRNA mediated knockdown over the course of the experiment. 50 cell equivalents (eq.) were used for the ddTRAP assays (n = 6). Data are expressed as means  $\pm$  standard errors of the mean.
- (D) Western blot showing *NOVA1* protein levels in H920 cells with control non-silencing shRNA or *NOVA1* shRNA mediated knockdown. Representative images shown (n = 2).
- (E) H1299 and H920 steady state *hTERT* transcript levels in control non-silencing shRNA or stable shRNA knockdown of *NOVA1* cells. RT-ddPCR was used to assay *hTERT* at two different regions of the gene to infer expression of RT domain (exons 7 and 8) compared to total transcript expression levels (exons 15 and 16; n = 6).
- (F) Terminal Restriction Fragment (TRF) analysis of Calu6 cells with control non-silencing shRNA or *NOVA1* shRNA mediated knockdown at population doubling (PD) 5 and 50. Calu6 cells lack *NOVA1* protein (see Supplementary Figure 2I).
- (G) Calu6 cells steady state *hTERT* transcript levels in stable control non-silencing shRNA or shRNA knockdown of *NOVA1*. Calu6 cells lack *NOVA1* protein (see Supplementary Figure 2I). Data are expressed as means  $\pm$  standard errors of the mean.
- (H) Telomerase activity determined by ddTRAP in Calu6 cells with control non-silencing shRNA or *NOVA1* shRNA mediated knockdown over the course of the experiment. Calu6 cells lack *NOVA1* protein. 50 cell equivalents (eq.) were used in the assay. Data are expressed as means  $\pm$  standard errors of the mean.
- (I) Western blot of Calu6 cells with control non-silencing shRNA (CTL) or shRNA to *NOVA1*. H920 cells protein lysate was used as a positive control for *NOVA1* antibody.
- (J) Calu6 cells growth curves with control non-silencing shRNA and *NOVA1* shRNA.
- (K) H1299 cells growth curves with control non-silencing shRNA and *NOVA1* shRNA.
- (L) H920 cells growth curves with control non-silencing shRNA and *NOVA1* shRNA.
- (M) HBEC3KT growth curve with control non-silencing shRNA and *NOVA1* shRNA.
- (N) Wild type (WT) Calu6 cells and Calu6 cells with *NOVA1* expression (lentiviral V-5 tagged *NOVA1* stable cell line) terminal restriction fragment length analysis (TRF).
- (O and P) Growth curves of BJ cells treated with control non-silencing or *NOVA1* siRNA. Population doublings based on viable cells (O) or total cell number (P) are shown).
- (Q) Western blot of *NOVA1* in siRNA treated BJ cells. Representative image (n = 2).
- (R) RT-ddPCR analysis of *NOVA1* mRNA levels following siRNA treatment in BJ cells. Three replicates in each condition. Data are expressed as means  $\pm$  standard errors of the mean. Student's t test set at  $p < .05$  for significance, \*).
- (S) H2882 growth curve with *NOVA1* or control non-silencing shRNAs.
- (T) Terminal restriction fragment length analysis (TRF) in H1299 cells with a second shRNA to *NOVA1*. Ten samples in successive passage are shown from 5 PDs to 50 PD, every 5 PDs.
- (U) RT-ddPCR of *NOVA1* mRNA levels in the same ten samples in panel T. Shows loss of *NOVA1* KD via a selective growth advantage of cells with control levels of *NOVA1*. Data are expressed as means  $\pm$  standard errors of the mean.
- RT = reverse transcription; ddPCR = droplet digital PCR; PD = population doublings



### Supplementary Figure 3

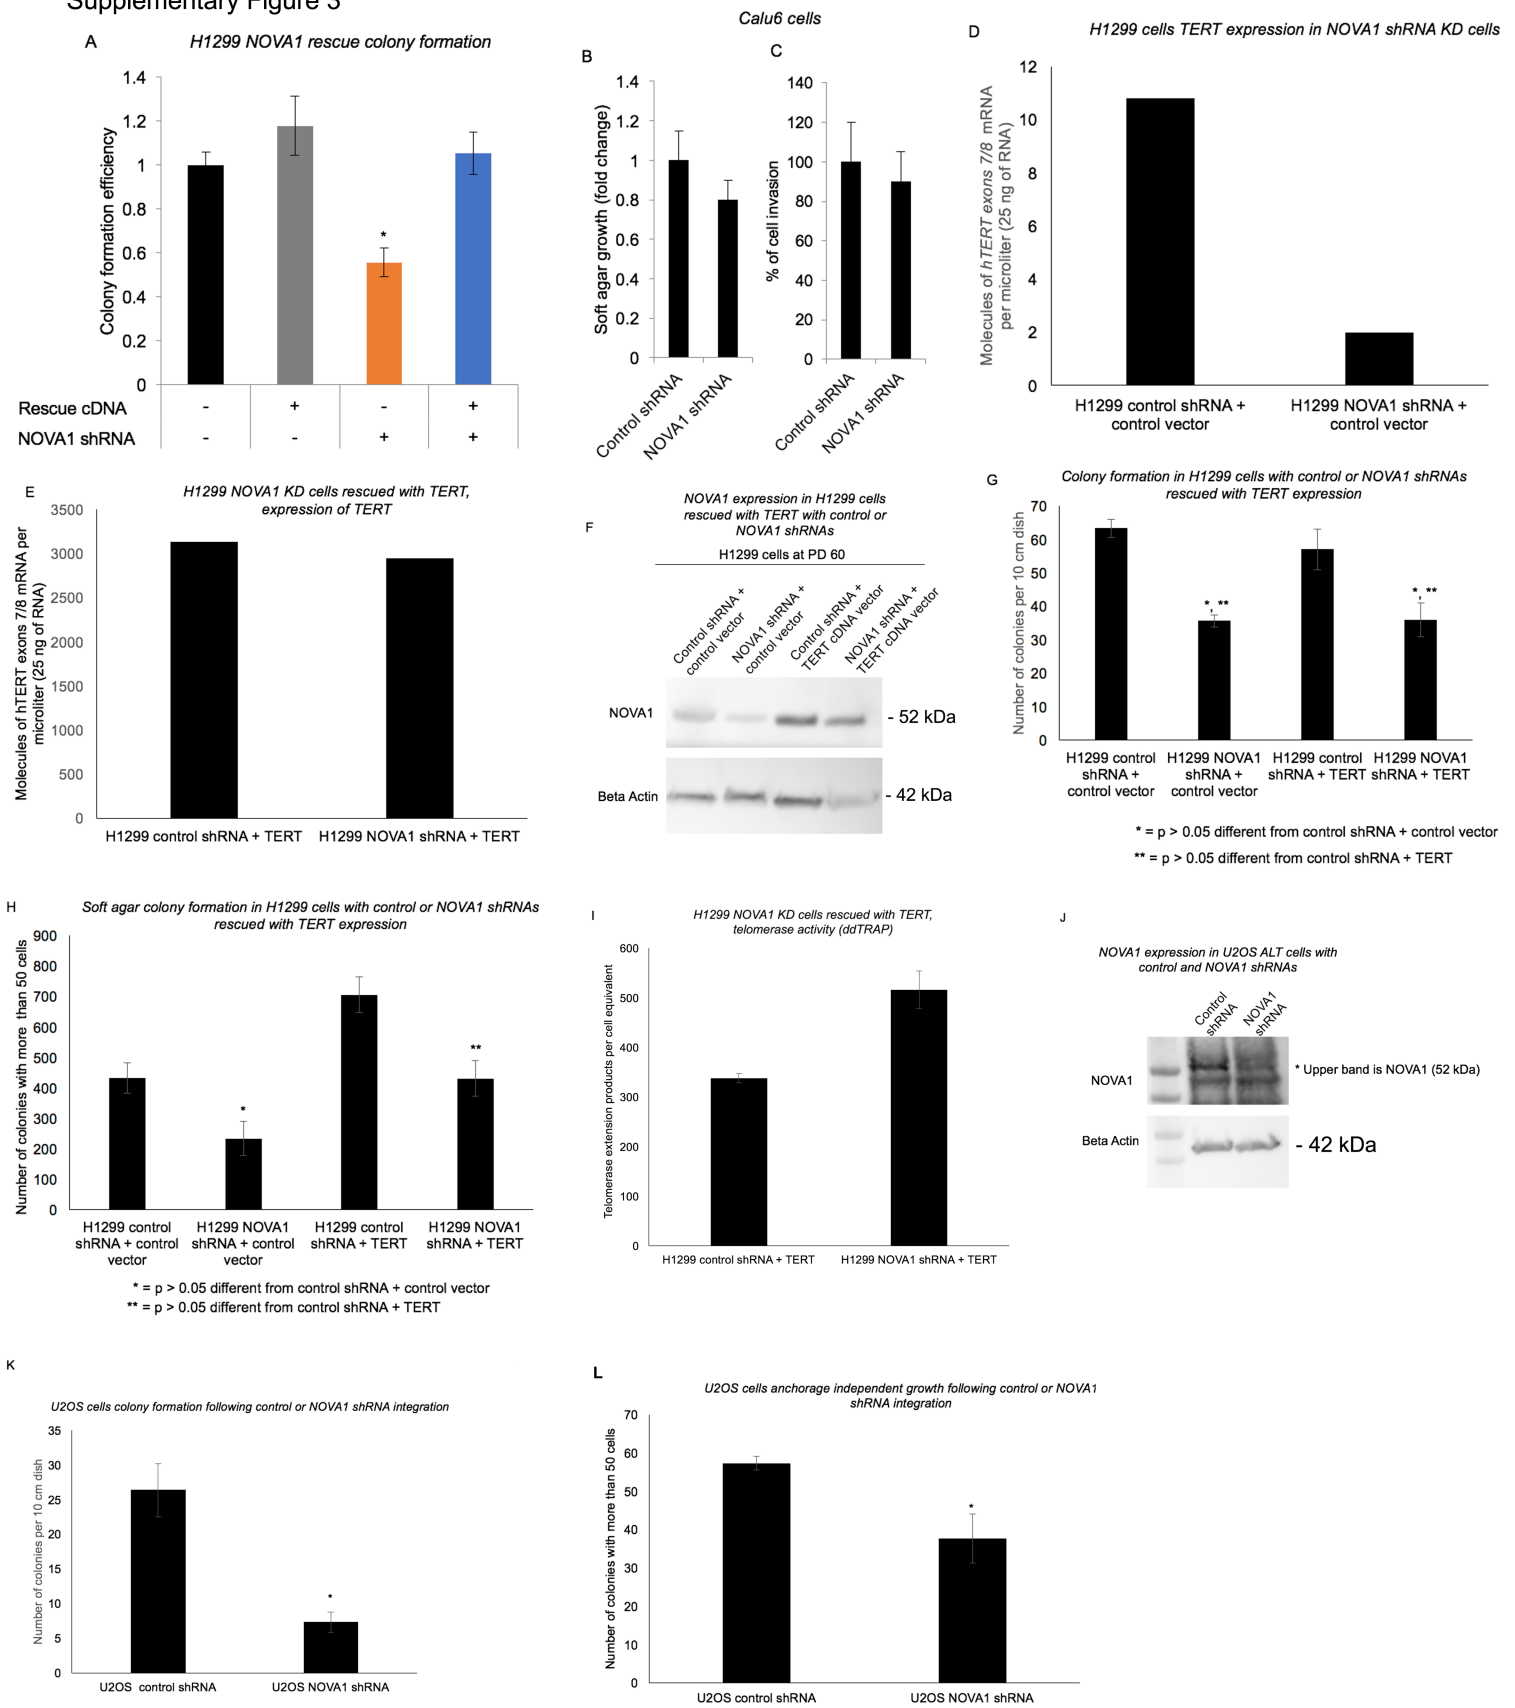

### Supplementary Figure 3

(A) Colony formation assay in H1299 rescue series cells. Analysis was performed in biological triplicate and technical duplicate (statistical significance tested with Student's *t* test,  $p > 0.05$ ).

(B-C) Tumorigenicity analysis in Calu6 cells with control and NOVA 1 shRNAs. Growth on soft agar and invasion through matrigel (Boyden Chamber) analysis was performed in biological triplicate and technical duplicate (statistical significance tested with Student's *t* test,  $p > 0.05$ ).

(D) Expression of endogenous hTERT expression at exons 7/8 in H1299 shRNA control or shRNA NOVA1. Single sample as confirmation.

(E) Expression of ectopic hTERT expression at exons 7/8 in H1299 shRNA control or shRNA NOVA1. Single sample as confirmation.

(F) Western blot of NOVA1 in H1299 shRNA controls or NOVA1 with or without hTERT expression vector. Single sample analyzed as confirmation.

(G) Colony formation assay in H1299 shRNA cells with or with ectopic hTERT expression. Analysis was performed in triplicate (three biological replicates of each condition; statistical significance tested with Student's *t* test,  $p > 0.05$ ).

(H) Soft agar assay in H1299 shRNA cells with or with ectopic hTERT expression. Analysis was performed in triplicate (three biological replicates of each condition; statistical significance tested with Student's *t* test,  $p > 0.05$ ).

(I) NOVA1 expression by western blot. Representative sample. Single samples for control and NOVA1 shRNAs.

(J) Colony formation assay in U2OS shRNA cells. Analysis was performed in triplicate (three biological replicates of each condition; statistical significance tested with Student's *t* test,  $p > 0.05$ ).

(K) Soft agar assay in U2OS shRNA cells. Analysis was performed in triplicate (three biological replicates of each condition; statistical significance tested with Student's *t* test,  $p > 0.05$ ).

**A** Expression of V5-tagged NOVA1 in HeLa mini gene cells

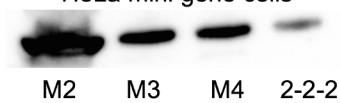

**B**

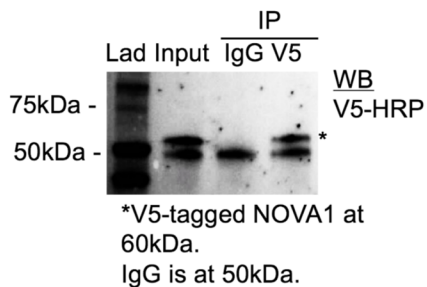

**C** GLRA2 expression in HeLa

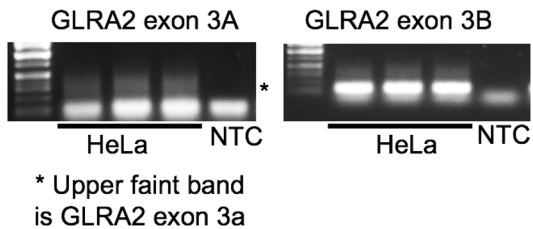

**D** GLRA2 expression in H1299 rescue series

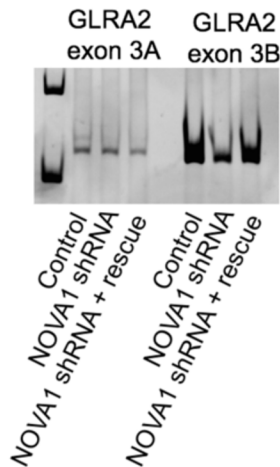

**E**

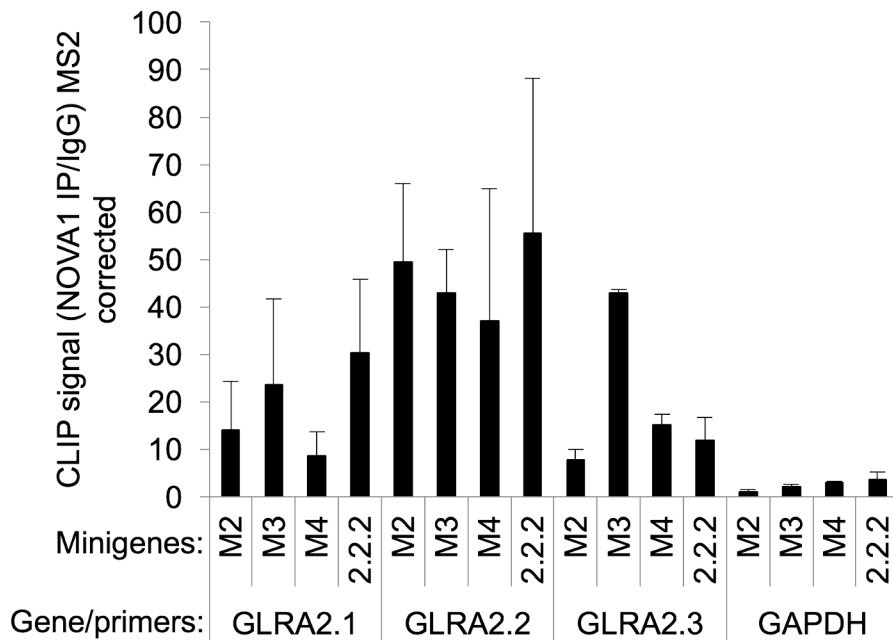

#### **Supplementary Figure 4**

(A) Expression of V5-Tagged NOVA 1 in HeLa cells containing *hTERT* minigenes M2, M3, M4, and 2-2-2. Single confirmatory blot.

(B) Representative immunoprecipitation of V5-tagged NOVA 1 from HeLa cells with *hTERT* minigenes. Single confirmatory blot.

(C) *GLRA2* mRNA expression of alternatively spliced exons 3A and 3B in HeLa cells with *hTERT* minigenes (n = 3).

(D) *GLRA2* mRNA expression of alternatively spliced exons 3A and 3B in H1299 cells with shRNA control, shRNA against NOVA 1, or with shRNA against NOVA 1 rescued with a NOVA 1 cDNA resistant to NOVA 1 shRNA. Representative image shown (n=3).

(E) Compiled CLIP data showing successful pulldown of NOVA 1 target gene *GLRA2* and a negative control RNA, *GAPDH* (n = 3 independent pull downs).

Supplementary Figure 5

**A**

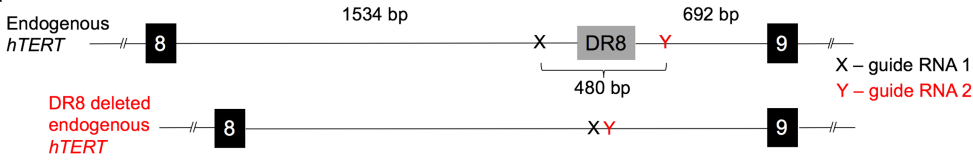

**B**

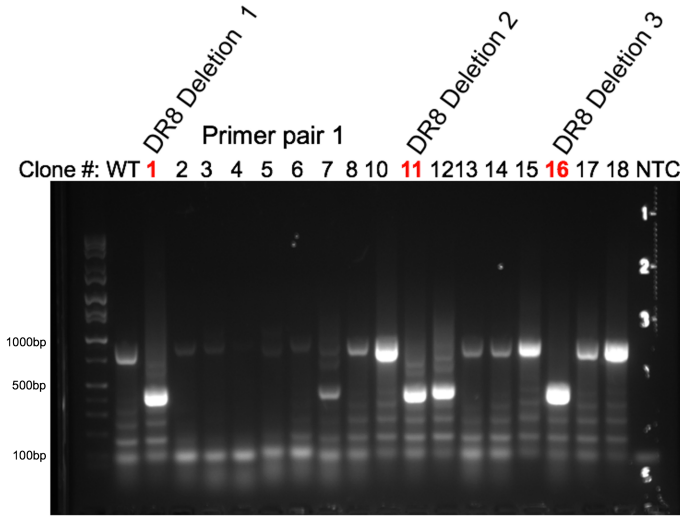

**C**

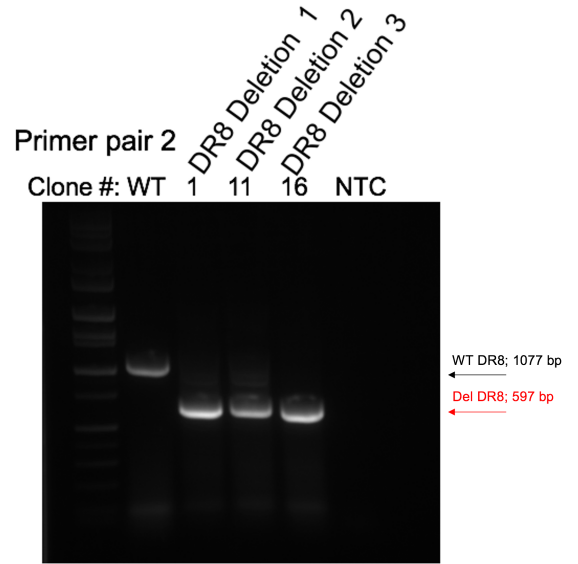

**D**

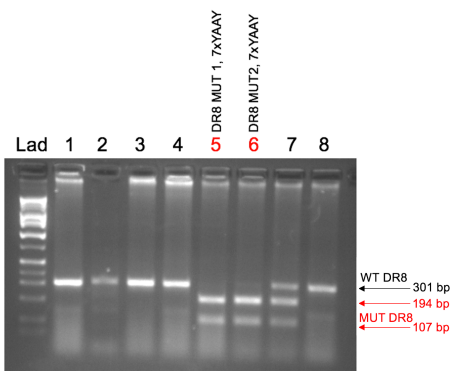

**E**

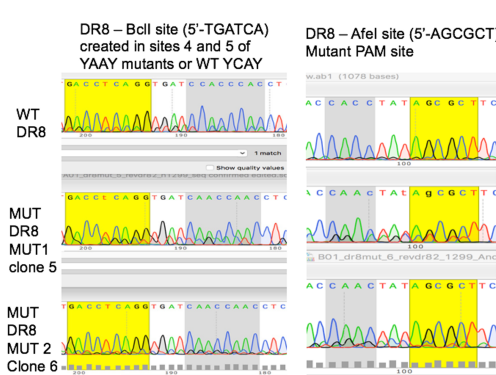

**F**

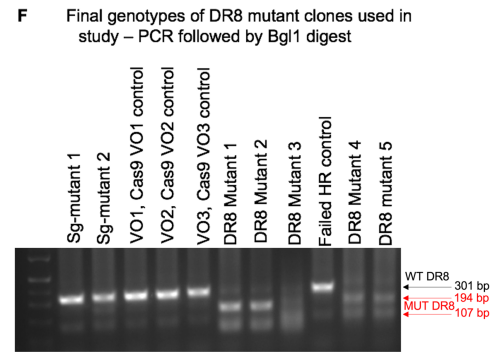

**G** *hTERT* 5-9 steady state expression by RT-PCR

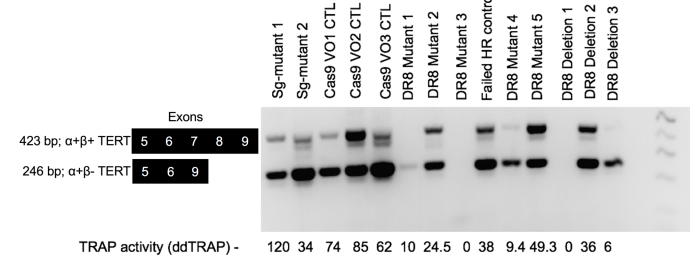

**H** *hTERT* steady state expression by RT-ddPCR

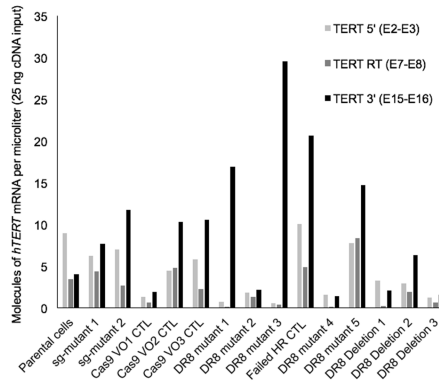

**I** *NOVA1* expression by RT-ddPCR

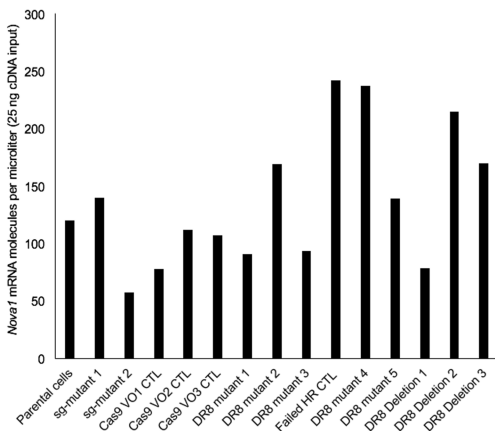

**J**

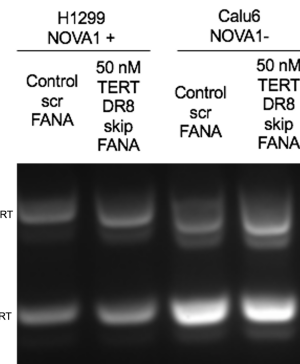

**K**

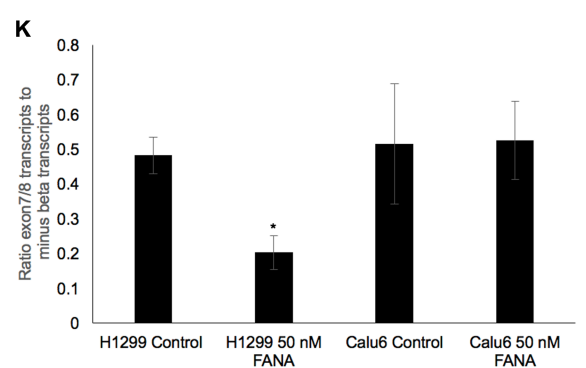

### Supplementary Figure 5

(A) Cartoon of hTERT locus showing DR8 in intron 8 deletion scheme and primer locations for genotyping.

(B) Agarose gel following PCR with primer pair 1 to detect hTERT DR8 deletion.

(C) Agarose gel following PCR with primer pair 2 in WT and mutants 1 (DR8 Deletion 1), 11 (DR8 Deletion 2), and 16 (DR8 Deletion 3).

(D) Agarose gel of digested PCR product of WT (lane 1) and attempted CRISPR/Cas9 manipulation of intron 8 to be NOVA1 resistant.

(E) Sanger sequencing confirming gel analysis of manipulated alleles.

(F) Agarose gel of showing genotypes of final hTERT DR8 mutant and WT clones used in this study.

(G) *hTERT* 5-9 gel PCR analysis of steady state mRNA levels of mutant H1299 cells. TRAP quantification (telomerase extension products per cells equivalent) shown below each clone's lane.

(H) *hTERT* ddPCR analysis of steady state mRNA levels in mutant H1299 cells.

(I) *NOVA1* mRNA expression (exon 4 containing) levels in mutant H1299 cells.

(J) H1299 and Calu6 cells expression of *hTERT* (RT-PCR) exon 5-9 following 48 hrs. treatment with 2'FANA antisense (50 nM) *hTERT* DR8+19 oligos. Representative image.

(G) Quantification of *hTERT* splicing following treatment with 2'FANA antisense (50 nM) *hTERT* DR8+19 oligos (three biological replicates of each condition; statistical significance tested with Student's *t* test,  $p > 0.05$ ).

**Supplementary Figure 6. Primer location for measurement of hTERT mRNA expression and splicing variants**

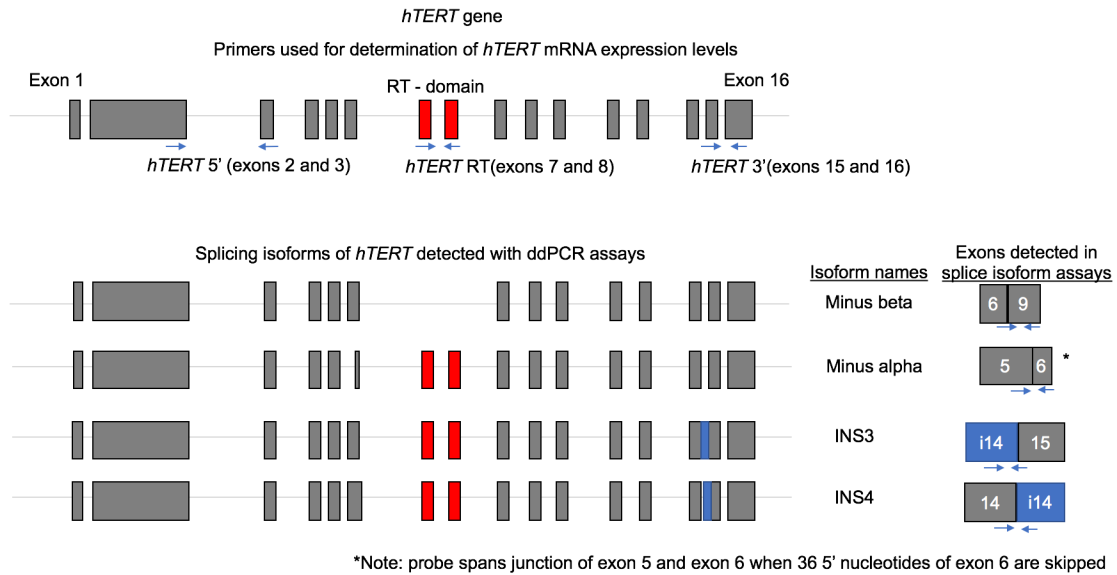

Supplementary Figure 6. hTERT primer locations. Cartoon schematic showing locations of selected primers and probes for measurement of hTERT splicing and steady state mRNAs. Upper cartoon shows primer locations used to measure hTERT steady state mRNAs at three different locations across the gene locus. Lower cartoons show intronic and exonic structures of 4 splice variants and the location of the primers used to measure these variants in this manuscript.

Figure 1E Supplementary Figure 7 – Uncropped blots and gel images (page 1 of 3)

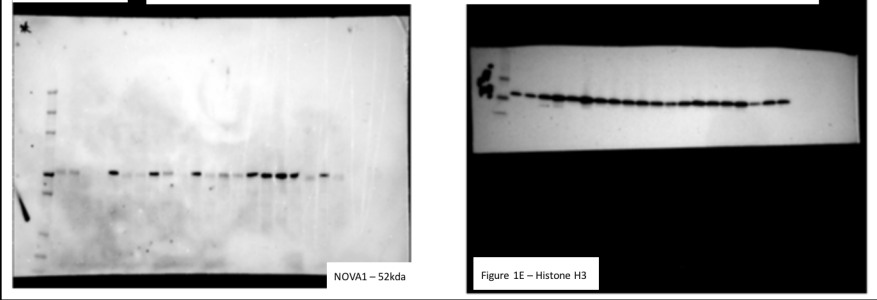

Figure 2A

Long-term shRNA knockdown of NOVA1 shortens telomeres over time

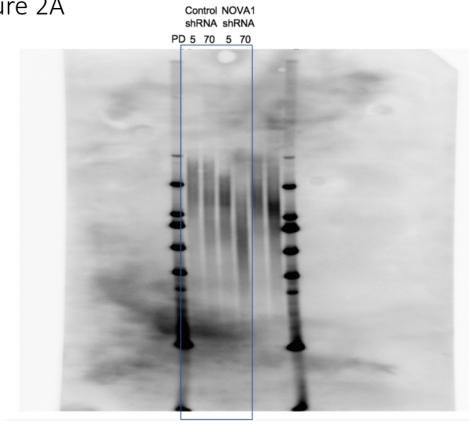

Figure 2C

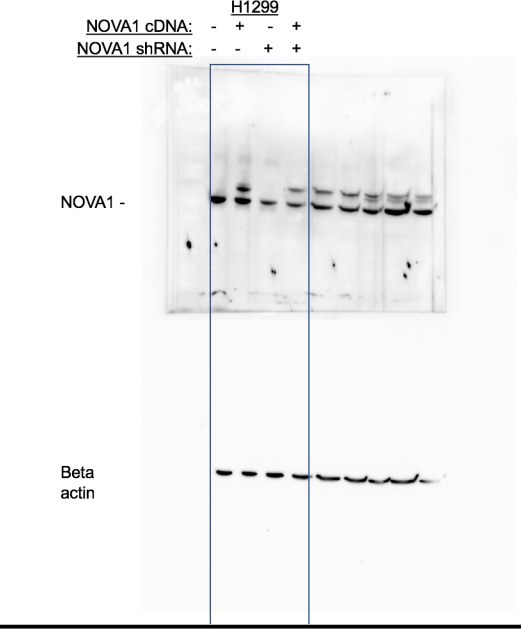

Figure 2D hTERT 5-9 splicing in rescue series

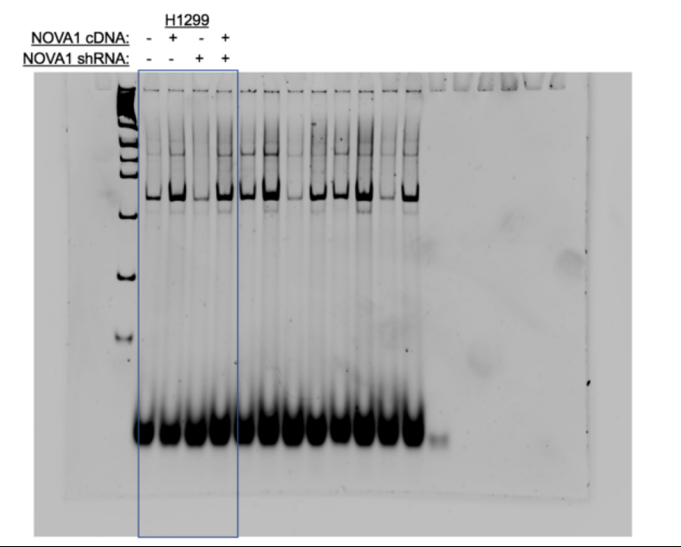

Figure 2F NOVA1 over expression in calu6

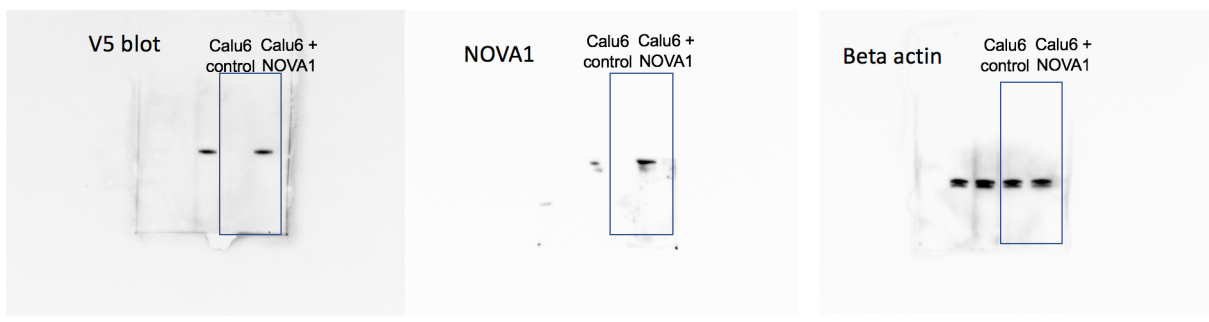

Supplementary Figure 2

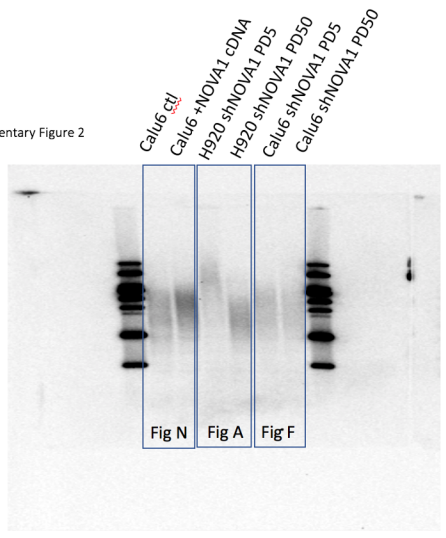

Supplementary Figure 2 D – NOVA1 western H920 cells

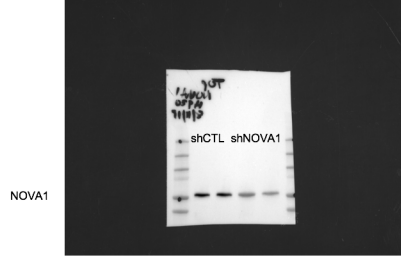

Supplementary Figure 2 D – NOVA1 western H920 cells

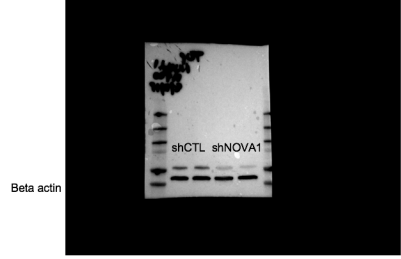

Supplementary Figure 2 – NOVA1 western Calu6 cells

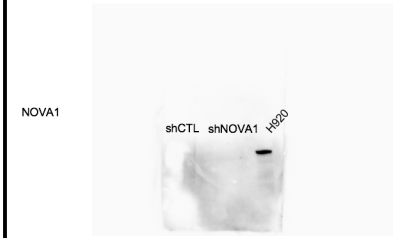

Supplementary Figure 2 – NOVA1 western Calu6 cells

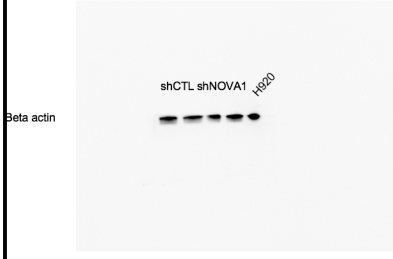



Supplementary Figure 7 – Uncropped blots and gel images (page 2 of 3)

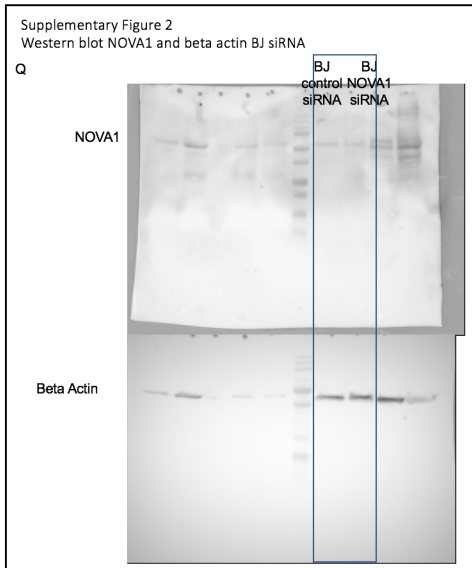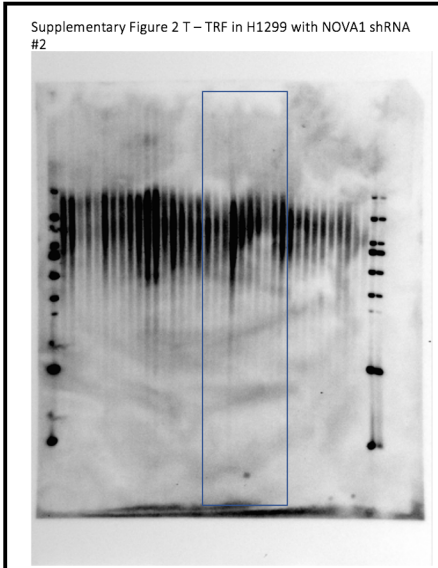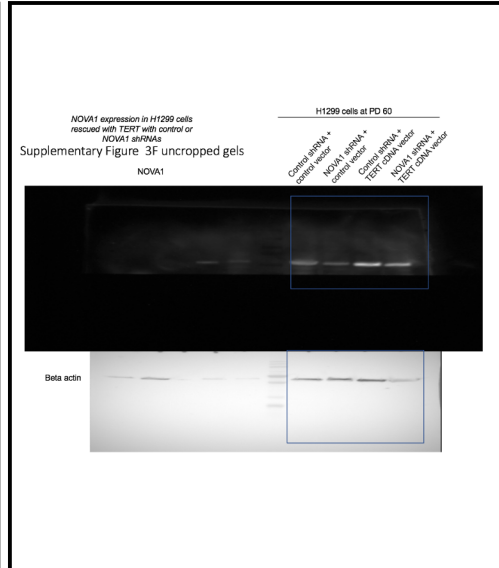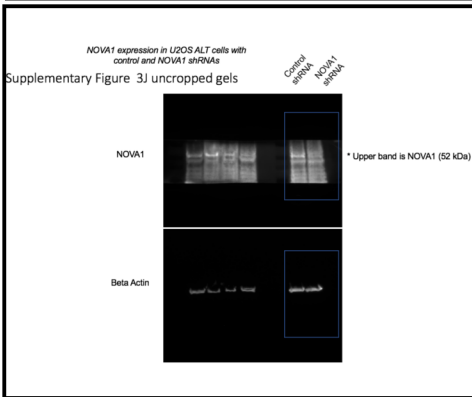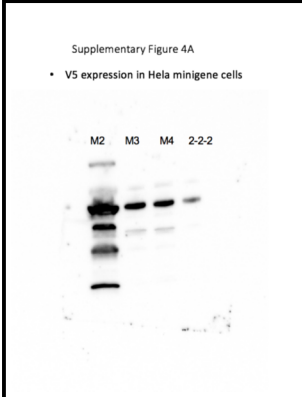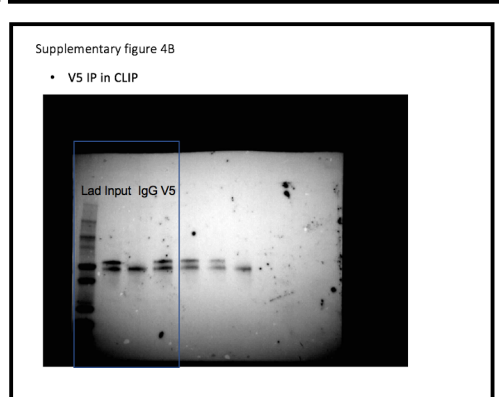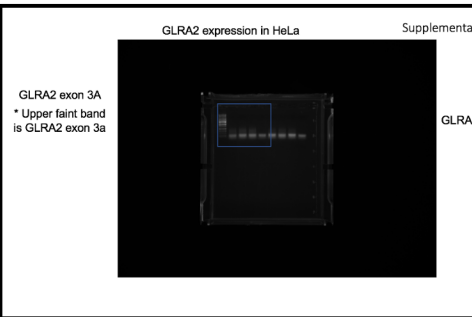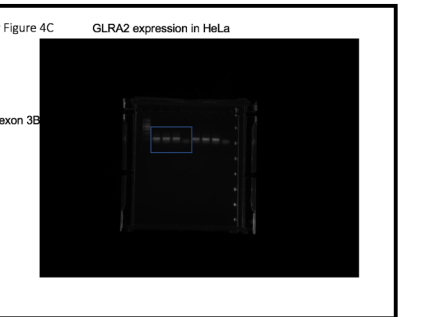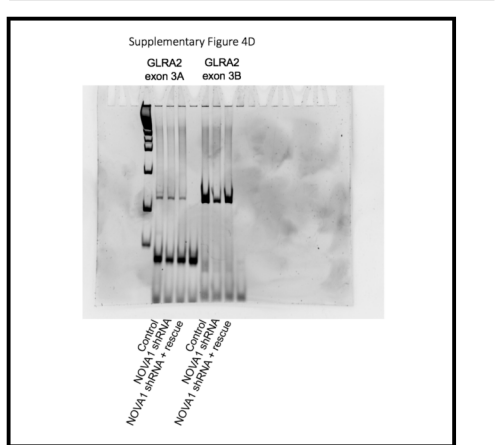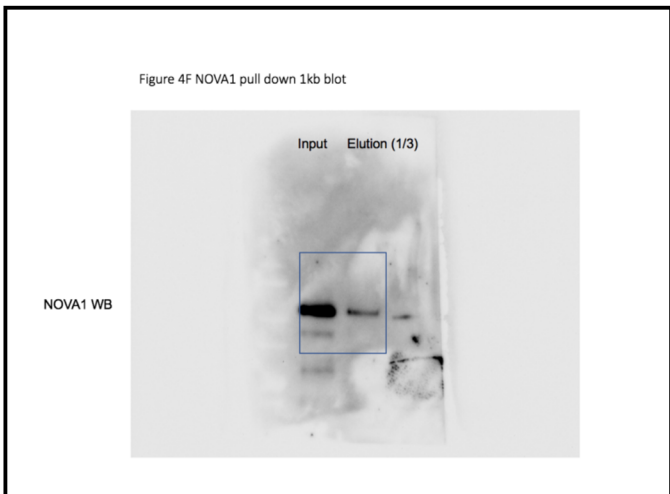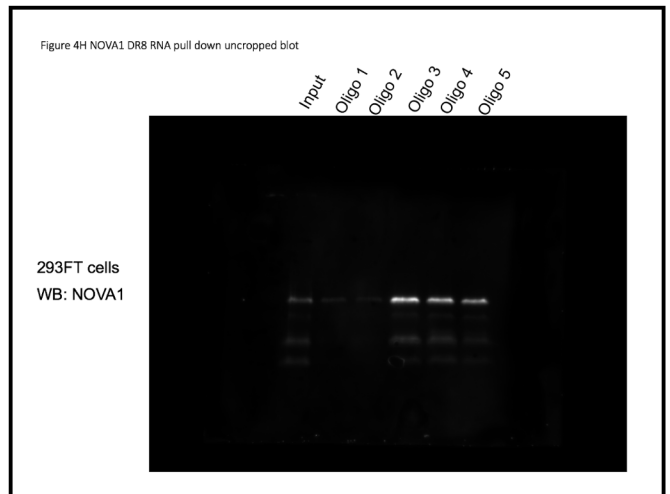

Supplementary Figure 7 – Uncropped blots and gel images (page 3 of 3)

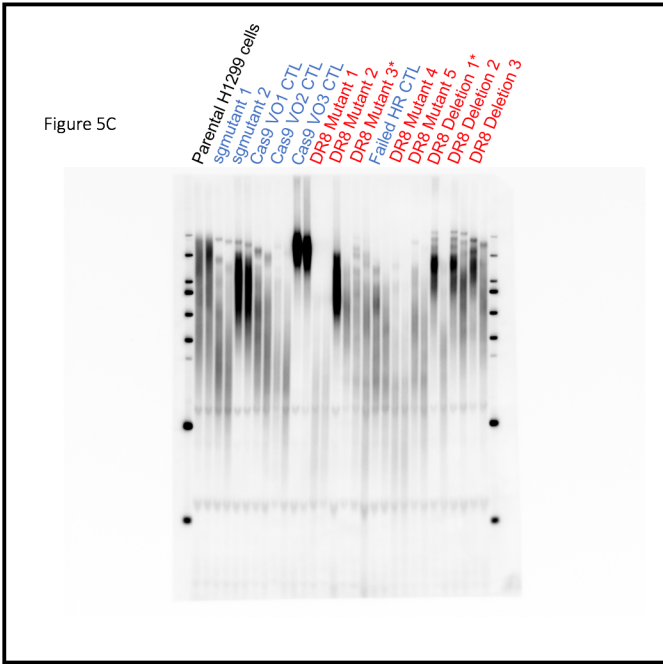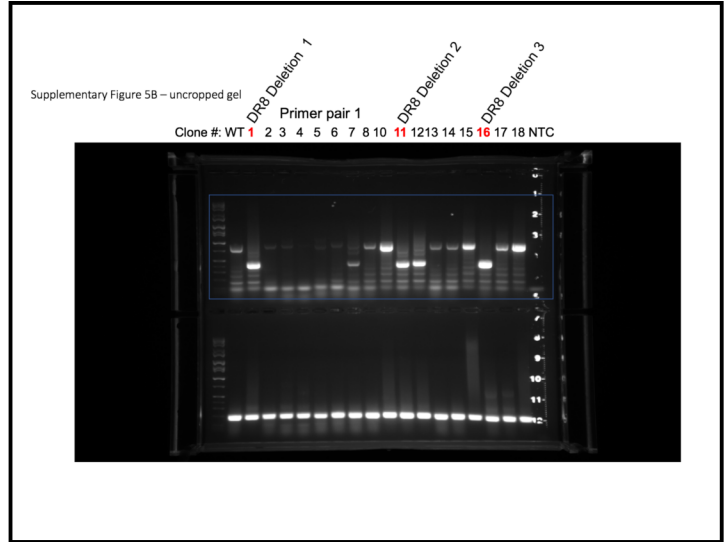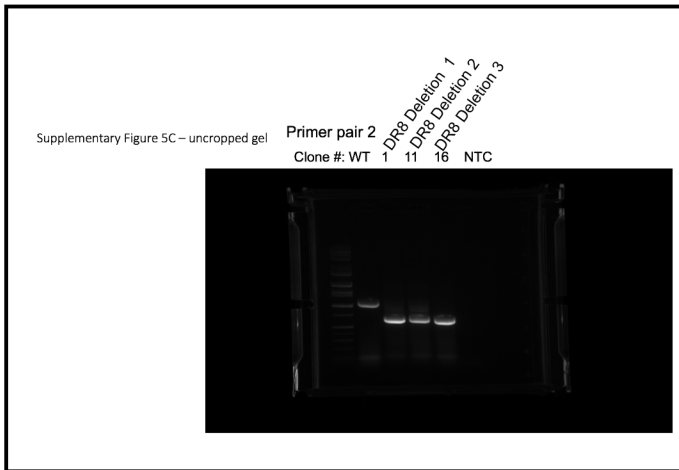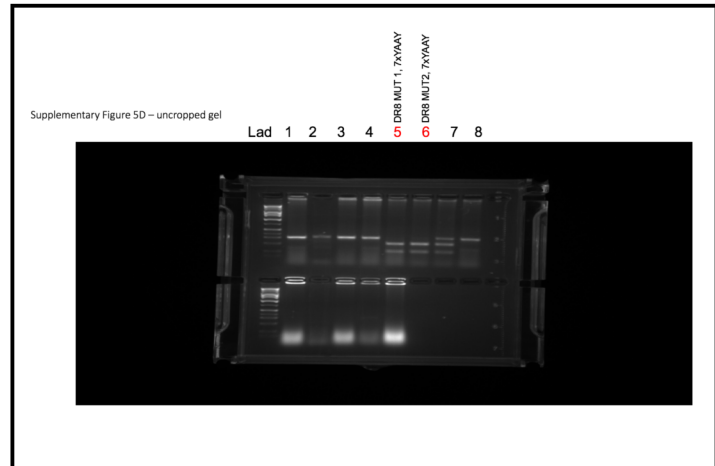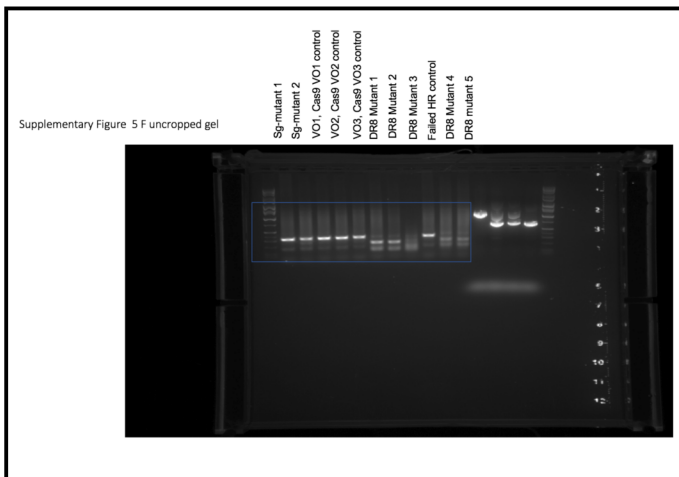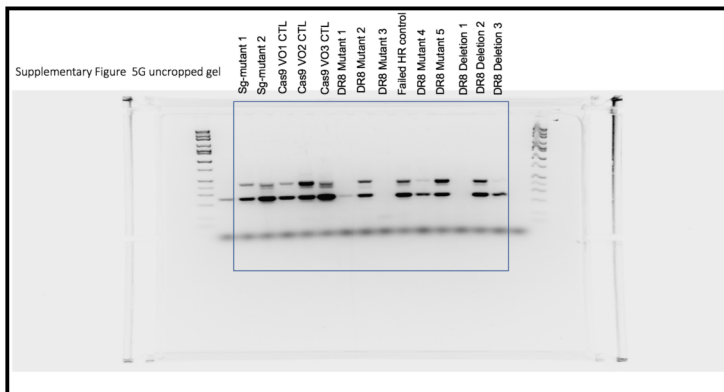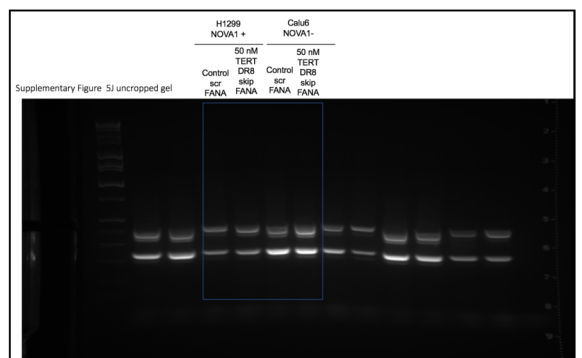

## Supplementary References

1. Wong MS, Chen L, Foster C, Kainthla R, Shay JW, Wright WE. Regulation of telomerase alternative splicing: a target for chemotherapy. *Cell Rep* **3**, 1028-1035 (2013).
2. Yi X, Shay JW, Wright WE. Quantitation of telomerase components and hTERT mRNA splicing patterns in immortal human cells. *Nucleic Acids Res* **29**, 4818-4825 (2001).
3. Listerman I, Sun J, Gazzaniga FS, Lukas JL, Blackburn EH. The major reverse transcriptase-incompetent splice variant of the human telomerase protein inhibits telomerase activity but protects from apoptosis. *Cancer Res* **73**, 2817-2828 (2013).
4. Yi X, White DM, Aisner DL, Baur JA, Wright WE, Shay JW. An alternate splicing variant of the human telomerase catalytic subunit inhibits telomerase activity. *Neoplasia* **2**, 433-440 (2000).
5. Zhu S, Rousseau P, Lauzon C, Gandin V, Topisirovic I, Autexier C. Inactive C-terminal telomerase reverse transcriptase insertion splicing variants are dominant-negative inhibitors of telomerase. *Biochimie* **101**, 93-103 (2014).
6. Withers JB, Ashvetiya T, Beemon KL. Exclusion of exon 2 is a common mRNA splice variant of primate telomerase reverse transcriptases. *PLoS One* **7**, e48016 (2012).
